# Supplementary material for: Janus zirconium halide ZrXY (X, Y = Br, Cl and F) monolayers with high lattice thermal conductivity and strong visible-light absorption
Source: Royal Society of Chemistry journal article supplement (doi:10.1039/d2cp04002f), 2022-11-15
Supplement: d2cp04002f1.pdf [file d2cp04002f1.pdf]

**Electronic Supplementary Information for:**

**Janus Zirconium Halide ZrXY (X, Y = Br, Cl & F) Monolayers with High  
Lattice Thermal Conductivity and Strong Visible-Light Absorption**

Janpreet Singh<sup>a,\*</sup>, Gurinder Singh<sup>b</sup> and Surya Kant Tripathi<sup>c</sup>

<sup>a</sup>Department of Physics, Akal University, Talwandi Sabo, Punjab, 151302, India,

<sup>b</sup>Department of UIET, Panjab University SSG Regional Centre, Hoshiarpur, Punjab-146021,  
India,

<sup>c</sup>Department of Physics, Centre of Advanced Study in Physics, Panjab University,  
Chandigarh-160014, India

\*janpreetsidhu@gmail.com

Table S1: The lattice parameters (a and b), bond lengths, bond lengths, and binding energy ( $E_b$ ) of Janus ZrXY monolayers in 1T phase.

| Material | a=b (Å) | Zr-Br (Å) | Zr-Cl (Å) | Zr-F (Å) | $E_b$ (eV) |
|----------|---------|-----------|-----------|----------|------------|
| ZrBrCl   | 3.419   | 2.773     | 2.648     | -        | -4.914     |
| ZrBrF    | 3.287   | 2.743     | -         | 2.336    | -5.430     |
| ZrClF    | 3.184   | -         | 2.608     | 2.315    | -5.722     |

Table S2: The fractional ionic character (FIC) values for bonds in Janus ZrBrCl, ZrBrF, and ZrClF monolayers.

| Material | Zr→Br | Zr→Cl | Zr→F  |
|----------|-------|-------|-------|
| ZrBrCl   | 36.10 | 30.68 | -     |
| ZrBrF    | 39.96 | -     | 27.37 |
| ZrClF    | -     | 37.55 | 29.42 |

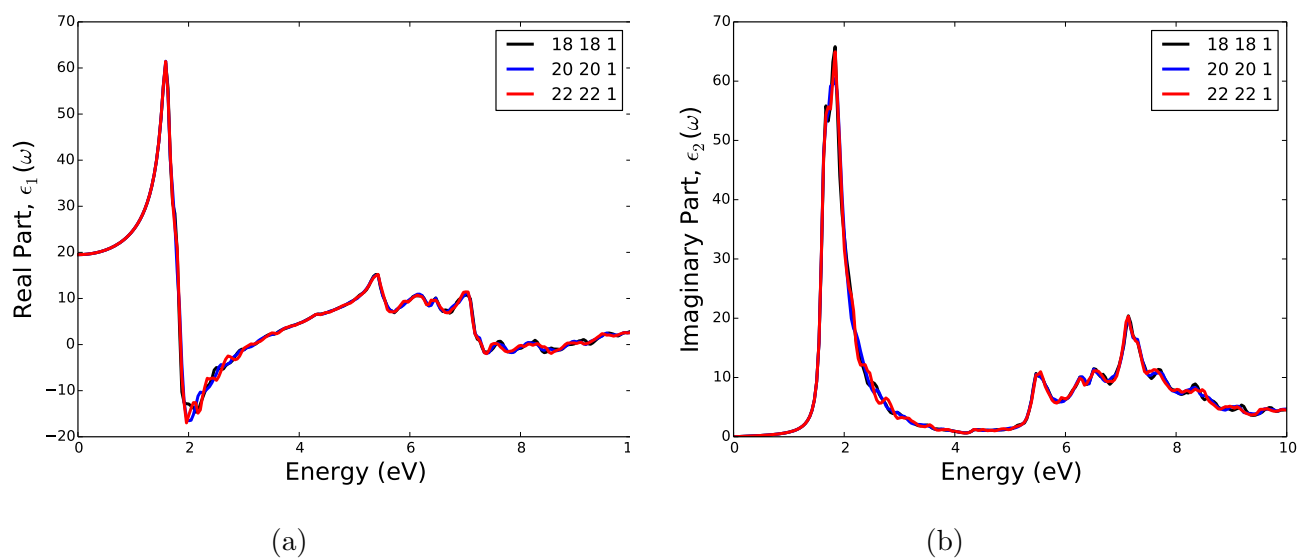

Figure S1: Convergence of (a) real and (b) imaginary part of dielectric constant for grid size  $18 \times 18 \times 1$ ,  $20 \times 20 \times 1$ , and  $22 \times 22 \times 1$ .

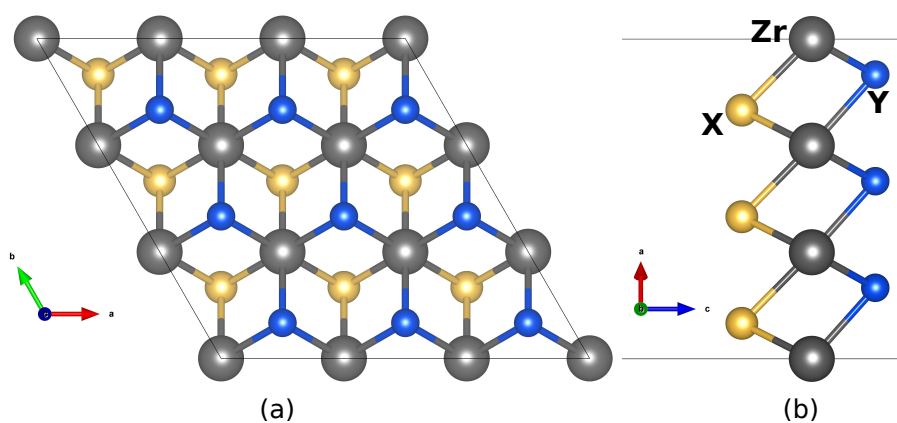

Figure S2: Top view (a) and side view (b) of the Janus  $ZrXY$  monolayer in 1T phase. Here X, Y=Br, Cl, F

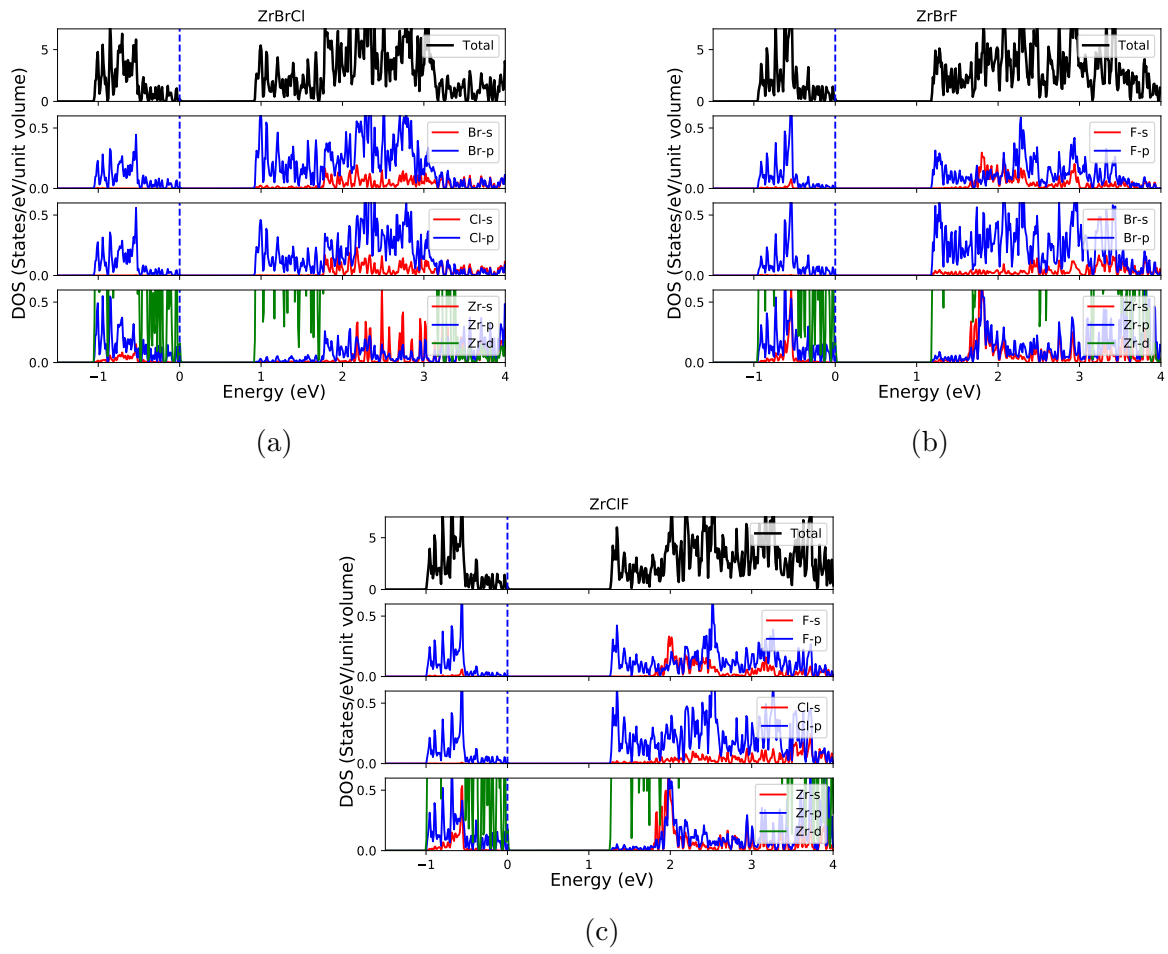

Figure S3: The atom-projected density of states for (a) ZrBrCl, (b) ZrBrF, and (c) ZrClF.

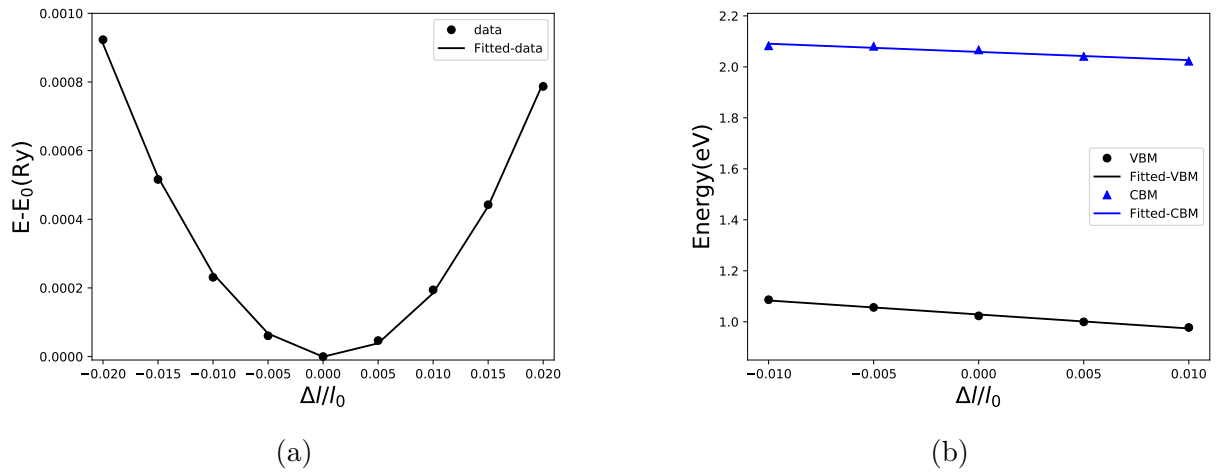

Figure S4: (a) Graph and parabolic fit between energy and strain, (b) Graph and straight fit graph between band edges ( $E_{CBM}$ , and  $E_{VBM}$ ) and strain for ZrBrCl monolayer.

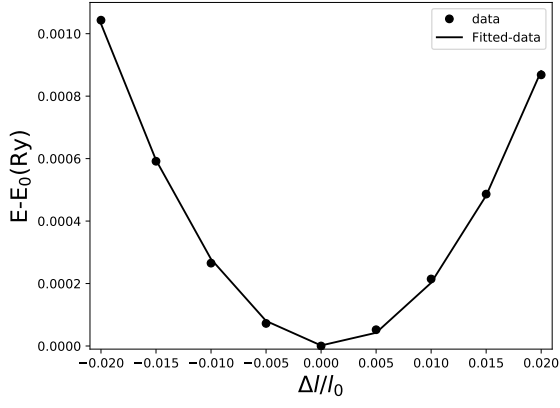

(a)

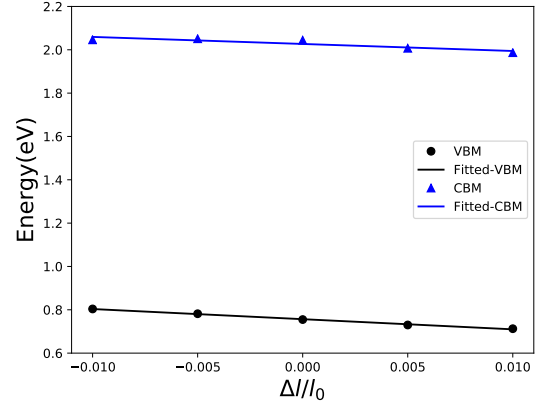

(b)

Figure S5: (a) Graph and parabolic fit between energy and strain, (b) Graph and straight fit graph between band edges ( $E_{CBM}$ , and  $E_{VBM}$ ) and strain for ZrBrF monolayer.

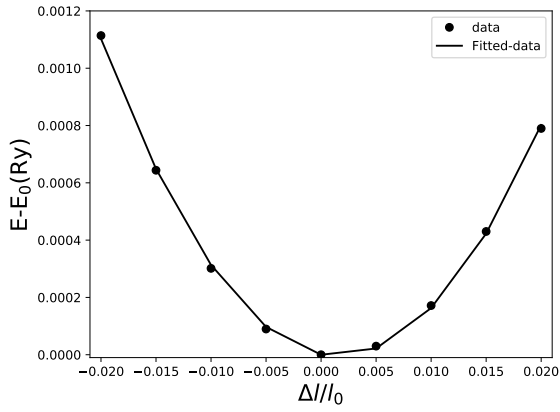

(a)

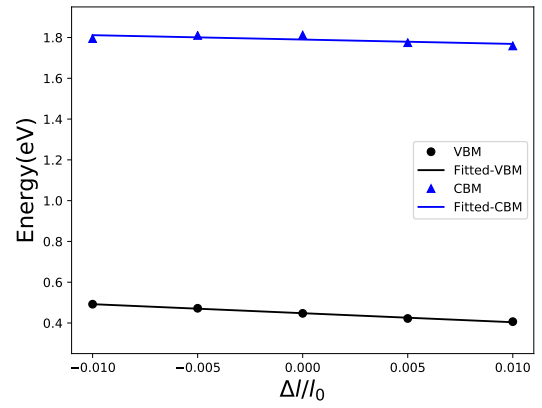

(b)

Figure S6: (a) Graph and parabolic fit between energy and strain, (b) Graph and straight fit graph between band edges ( $E_{CBM}$ , and  $E_{VBM}$ ) and strain for ZrClF monolayer.

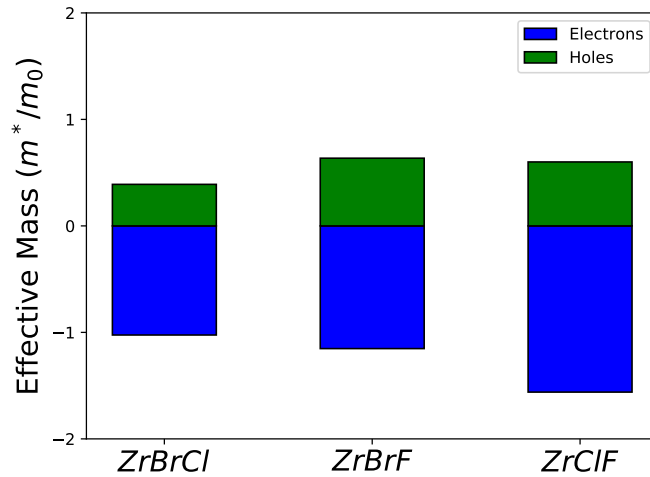

Figure S7: Effective mass of electrons and holes determined using slope method.

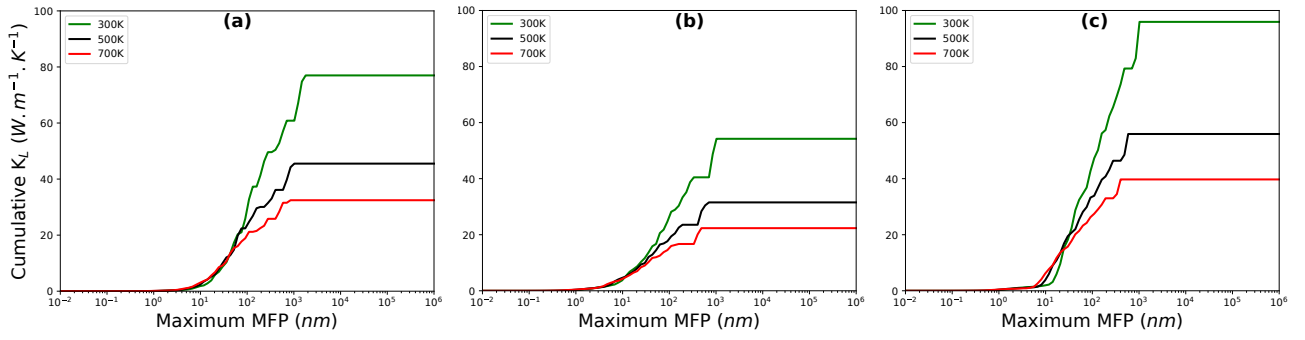

Figure S8: The cumulative lattice thermal conductivity with respect to the mean free path of (a) ZrBrCl, (b) ZrBrF, and (c) ZrClF monolayer at 300 K, 500 K and 700 K.
